# Supplementary material for: Key hepatic metabolic pathways are altered in germ-free mice during pregnancy
Source: PubMed Central journal article supplement (PMC7954286; doi:10.1371/journal.pone.0248351), 2021-03-12
Supplement: pone.0248351.s001.pdf [file pone.0248351.s001.pdf]

S1 Figure. Linoleic acid metabolism

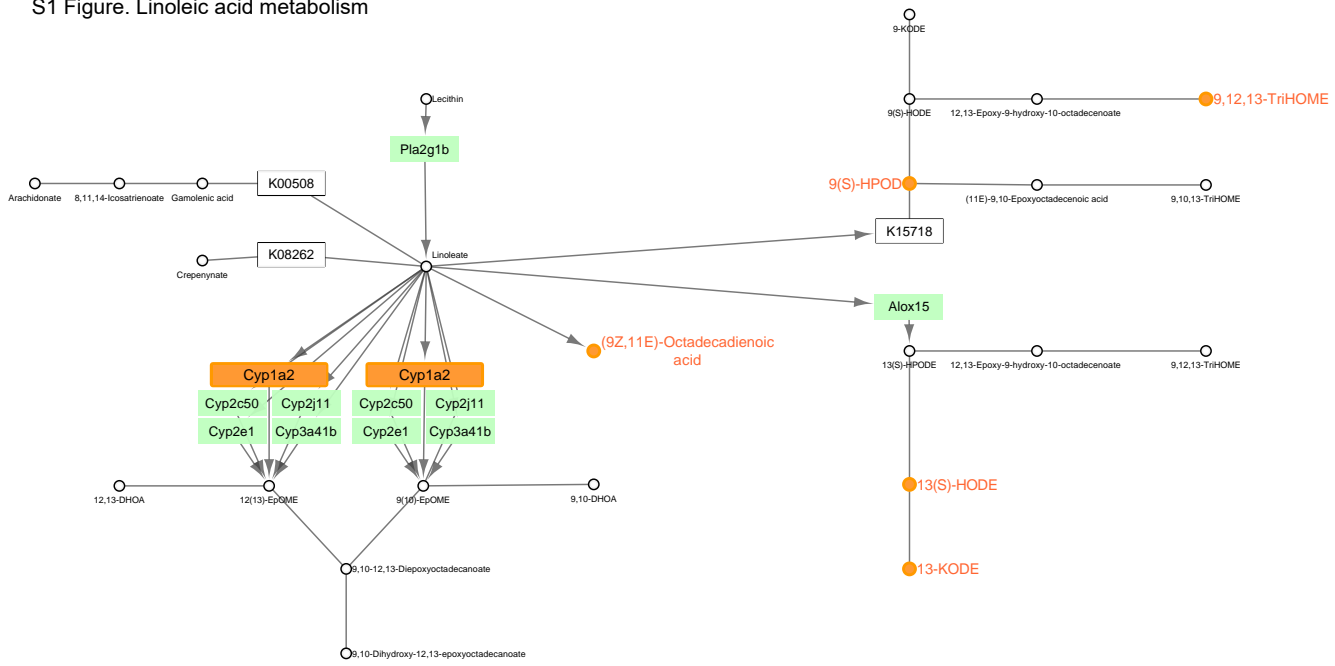

S1 Figure. Linoleic acid metabolism KEGG pathway. Hepatic genes are illustrated in green boxes and metabolites are presented as circles. Orange highlights are those enriched by analysis.
