# Supplementary material for: Key hepatic metabolic pathways are altered in germ-free mice during pregnancy
Source: PubMed Central journal article supplement (PMC7954286; doi:10.1371/journal.pone.0248351), 2021-03-12
Supplement: pone.0248351.s004.pdf [file pone.0248351.s004.pdf]

# S4 Steroid Hormone Biosynthesis

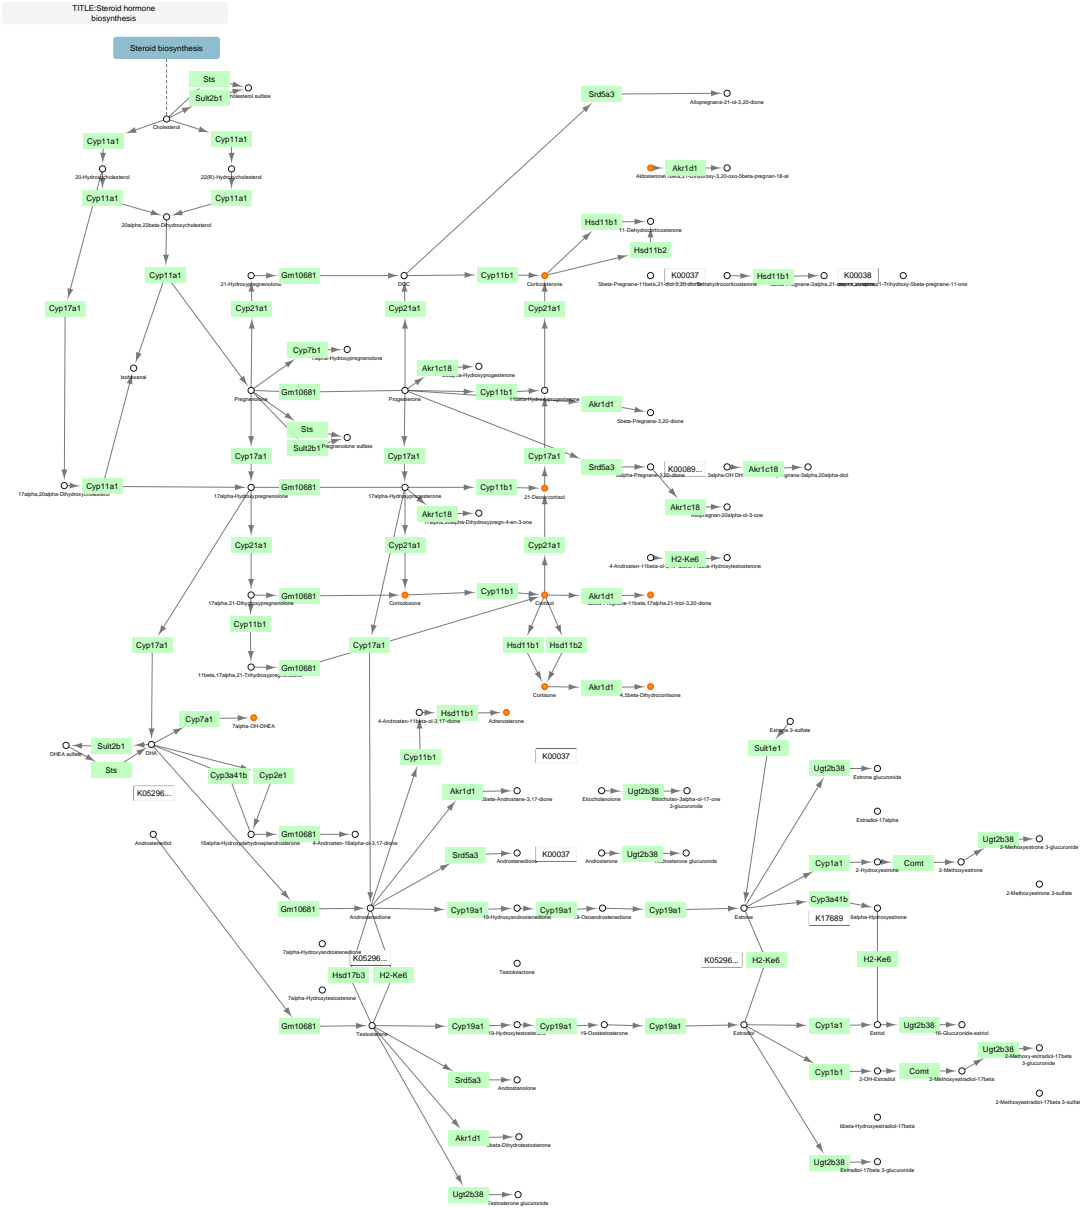

S4 Figure. Steroid hormone biosynthesis KEGG pathway. Hepatic genes are illustrated in green boxes and metabolites are presented as circles.
